# Supplementary material
Source: PubMed Central journal article supplement (PMC2678930)
Supplement: ddp128_1.pdf [file ddp128_1.pdf]

**Supplementary text and figures for “Distinct mutations in the glycogen debranching enzyme found in Glycogen Storage Disease Type III lead to impairment in diverse cellular functions”**

Alan Cheng, Mei Zhang, Minoru Okubo, Kaoru Omichi, and Alan R. Saltiel

**Supplementary Figure 1. Glucosidase activity of AGL mutants.** The assay was performed using glucose- $\beta$ -cyclodextrin as a substrate, and normalized to AGL expression.

**Supplementary Figure 2. Conservation of the carbohydrate binding region of AGL.** A sequence alignment showing regions of high similarity within the CBD of AGL. The species and the accession numbers for the sequences are as follows: Homo sapiens (P35573), Saccharomyces cerevisiae (Q06625), Synechococcus elongatus PCC 7942 (Q8KPV1), Deinococcus radiodurans (Q9RXW4), Thermoplasma acidophilum (Q9HL89), Vibrio vulnificus (Q8D4R0), and Methanosarcina acetivorans (Q8TMM8)

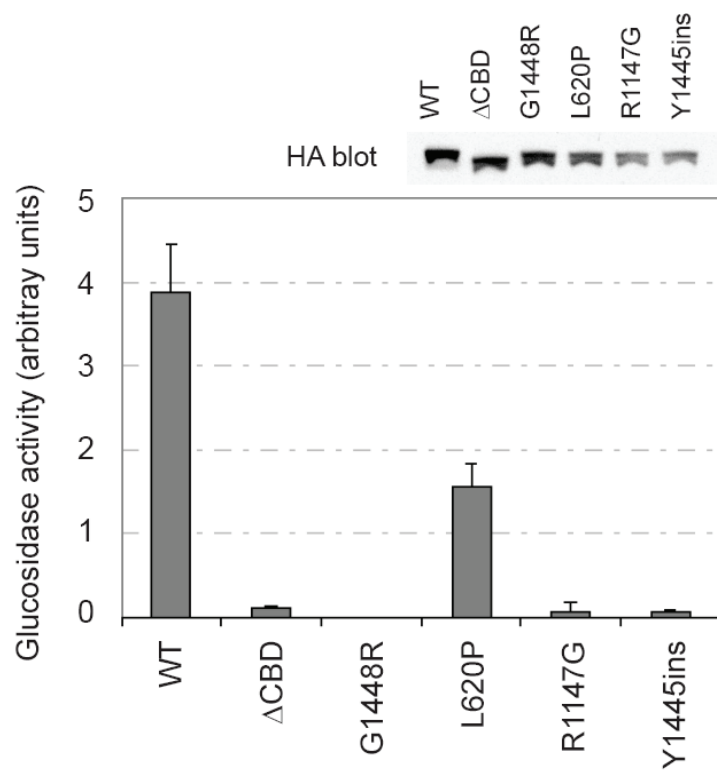

Cheng Figure S1

```
1 10 20 30 40 50
H.sapiens MGHSKQIRILLNEMEK.....LEKTLFRLEQQYELQFRLGP.TLQ GKAVTVYTNYPFPG
S.cerevisiae MNRSLLLRLSDTGEPITSCSYGKGVLTLPPIPLPKDAPKDPQLYTVKLLVSAGSPVARDGLVWTNCPDPH
S.elongatus .....
D.radiidurans .....
T.acidophilum .....
V.vulnificus .....
M.acetivorans .....

60 70 80 90 100 110
H.sapiens ET.FNREKFRSLDWNENPTEREDDSKYCKLNQQSGSFQYYFLQGN....EKSGGGYIVVDPILRVGAD
S.cerevisiae NTPFKRKDFYKKI IHSSFHEDDCID....LNVPAGSYCFYLSFRNDNEKLETTTRKYYFVALPMLYI..N
S.elongatus .....
D.radiidurans .....
T.acidophilum .....
V.vulnificus .....
M.acetivorans .....

120 130 140 150 160 170 180
H.sapiens NHVLPDLCVTLQTFLAKCLGPFDEWESRLRVAKESGYNMIHFTPLQTLGLSRSCYSLANQLELNPDFSRP
S.cerevisiae DQFLPLNSIALQSVVSKWLG..SDWEPILSKIAAKNYNMVHFTPLQERGESNSPYSIYDQLQFDQEHFKS
S.elongatus .....
D.radiidurans .....
T.acidophilum .....
V.vulnificus .....
M.acetivorans .....

190 200 210 220 230 240 250
H.sapiens NRKYTWNDVQGQVEKLLKKEWNVICITDVVYNHTAANSKWIQEHPECAYNLVNSPHLKPAAVLDLDRALWRFSP
S.cerevisiae P.....EDVKNLVEHIHRDLNMLSLTDIVFNHTANNSPWLVEHPEAGYNHITAPHLISAIELDQELLNFS
S.elongatus .....
D.radiidurans .....
T.acidophilum .....
V.vulnificus .....
M.acetivorans .....

260 270 280 290 300 310 320
H.sapiens CDVAEGKYKEKGIPALIENDHMMNSIRKLIWEDIFPKLKLWFFQVDVNKAVEQFRRLLTQE.....
S.cerevisiae RNLKS....WGYPTTELKNIEDLFKIMDGIKVHVLSGLKLWEYYAVNVQTAALRDIKAHWNDESNESESFP
S.elongatus .....
D.radiidurans .....
T.acidophilum .....
V.vulnificus .....
M.acetivorans .....

330 340 350 360 370 380
H.sapiens .NRRVTKSDPNQHLTIIQD....PEYRRFGCTVDMNIALTTFIP....HDKGPAAI EECNWFHHRMEE
S.cerevisiae ENIKDISSDFVKLASFVKDNVTEPNFGTLGERNSNRINVPKFIQLLKLINDGSDDESSESLATAQNILNE
S.elongatus .....
D.radiidurans .....
T.acidophilum .....
V.vulnificus .....
M.acetivorans .....

390 400 410 420 430 440 450
H.sapiens LNSEKHLINLQEQAVNCLLGNVVFYERLAGHGPKLGPVTRKHPLVTRYFTFPFEEIDFSMEESMIHLPN
S.cerevisiae VNLPLYREYDDDSEILEQLFNRIKYLRLDDGGPKQGPVTVDVPLTEPYFTR.....FKGKD
S.elongatus .....
D.radiidurans .....
T.acidophilum .....
V.vulnificus .....
M.acetivorans .....

460 470 480 490 500 510 520
H.sapiens KACFLMAHNGWVMGDDPLRNFAEPGSEVYLRRRELICWGDSVKLRYGNKPEDCPYLWAHMKKYTEITATYF
S.cerevisiae GTDYALANNGWIWNGNPLVDFASQNSRAYLRREVIWVGDCVKLRYGKSPEDSPYLWERMSKYEIMNAKIF
S.elongatus .....
D.radiidurans .....
T.acidophilum .....
V.vulnificus .....
M.acetivorans .....
MHTLPPTLYLKGTFNGWG...LDTFPVVPSPQQLQACVVLSADRHFQKI
```

530 540 550 560 570 580 590

H.sapiens QGVRLDNCHSTPLHVAEYMLDAARNLQPNLYVVAELFTGSEDLDN V F V T R L G I S S L I R E A M S A Y N S H E E G  
S.cerevisiae DGFRIDNCHSTPIHVGEYFLDLARKYNPNLYVVAELFSGSETLDC L F V E R L G I S S L I R E A M Q A W S E E L S  
S.elongatus . . . . . M T T F G R E I C S D L A I A Q Q R E W L V T N G I G G Y A S G T V A G L P T R S Y H  
D.radiidurans RTSSQLNVEPPGQSEIICHAGSRMTSAPVPSASAYTYGPAARNPDL E V L L T D G Q G G F A L S S L A G V P T R C H A  
T.acidophilum . . . . . M D L N S E W I I S N S N G S Y A S S T V S F A N T R T Y H  
V.vulnificus ADDRGTAQWTFSAHPTQAIELTEAIAHPLIATQGIENDLYIIPQK T E R F T L T L D C S Q P Q P S L T I T N G A N N  
M.acetivorans . . . . . M S G V R L G A D F L S T Y E E G T K R E W V I G N G L G G Y A S S T V I G A G T R T Y H

600 610 620

H.sapiens R L V Y R Y G G E P V G S F V Q P . . . . . C L R P L M P . . . . . A I A H A L F M D I T H  
S.cerevisiae R L V H K H G G R P I G S Y K F V P M D D F S Y P A D I N L N E E H C F N D S N D N S I R C V S E I M I P K I L T A P P H A L F M D C T H  
S.elongatus G L L V A A L K P P L D R T L L V T . . . . .  
D.radiidurans G L V V S Q Q . P P V S R F C H L V . . . . .  
T.acidophilum G I L V R R D P S K N S A T V L L S . . . . .  
V.vulnificus A E V E V E R A Q L H S Q L I P I C G . . . . .  
M.acetivorans G L L V A A P E N F P G R L L L L S . . . . .

630 640 650 660 670 680 690

H.sapiens D N E C P I V H R S A Y D A L P S T T I V S M A C C A S G S T R G Y D E I V P H Q I S V V S E E R F Y T K W N P E A L P S N T G E V N F Q S  
S.cerevisiae D N E T P P F E K R T V E D T L P N A A L V A L C S S A I G S V Y G Y D E I F P H L L N L V T E K R H Y D I S T P T G S P S . . . . . I  
S.elongatus . . . . . H L D E Q V D Y G K L S L P L S T T R W V D G T V A P R G Y E Q I E Q F G L E G T I P V W Q F A I A D A R L E K R . . . . .  
D.radiidurans . . . . . S P F E R L E V G G E S V D L H A L E V A P G V F E G R G L G L L T G A T V W D L L P E R E Q L W R G V W V R R H . . . . .  
T.acidophilum . . . . . K I F E V R Y G D A I F S I D T N Y Y R D S V F . P D G F K F I M A Y . A D I P V P K W S P S F G K D R T I N K . . . . .  
V.vulnificus . . . . . P T P N A P H R E H A L A I D T L F D T L A I E E S R R F P P V F G D N V D G Y Y E G Q T H C F V G A G R Y R H H Q G . . . . .  
M.acetivorans . . . . . S L D E I S I D K E V Y K L A T H K Y P D N I S . P E G F N Y L S E F . I R S P F P L W V Y Q A G D F T L K K K . . . . .

700 710 720 730 740 750 760

H.sapiens G I I A A R C A I S K L H Q E L G A K G F I Q V Y V D Q V D E D I V A V T R H S P S I H Q S V V A V S R T A F R N P K T S F Y S K E V P Q M  
S.cerevisiae G I T K V K A T L N S I R T S I G E K . . . . . A Y D I E D S E M H V H H Q G Q Y I T F H R M D V K S G K G W Y L I A R M K F S D N D D P N E  
S.elongatus . . . . .  
D.radiidurans . . . . .  
T.acidophilum . . . . .  
V.vulnificus . . . . .  
M.acetivorans . . . . .

770 780 790 800 810 820 830

H.sapiens C I P G K I E E V V L E A R T I E R N T K P Y R K D E N S I N G T P D I T V E I R E H I Q L N E S K I V K Q A G V A T K G P N E Y I Q E I E  
S.cerevisiae T L P . . . . . P V V L N Q S T C S . . . . . L R F S Y A L E R V G D E I P N D D K F I K G I P  
S.elongatus . . . . .  
D.radiidurans . . . . .  
T.acidophilum . . . . .  
V.vulnificus . . . . .  
M.acetivorans . . . . .

840 850 860 870 880 890 900

H.sapiens F E N L S P G S V I I F R V S L D P H A Q V A V G I L R N H L T Q F S . P H F K S G S L A V D N . A D P I L K I P F A S L A S R L T L A E L  
S.cerevisiae T K . . . . . L K E L E G F D I S Y D D S K K I S T I K L P N E F P Q G S I A I F E T Q Q N G V D E S L D H F I R S G A L K A T S S L T L E S I  
S.elongatus . . . . . I W M E P G A N T T L I S Y R F E R G S L P L Q L T V K G L V N Y R G Y H S R T Q A G . . . . . D W R  
D.radiidurans . . . . . A C M P Q D S G A L V L L Y E V R . S R Q S V T L T L G G F F V D R G M H A V H T T A P R L Q F T P L G S E V R  
T.acidophilum . . . . . A I V I D Q D S D T V V I K Y D F S G Q I P D S I Y L H P L V A F R S F H H V I R T G . . . . . S  
V.vulnificus . . . . . W Y L G G F A A F V D G Q L N K P E A C C A R L L P Y G I E H H Y A C H S R D R L S V H S G Q R R V A L S V Q S V E  
M.acetivorans . . . . . V F M V H G S N T T Y V L Y D I I S R K E G A L L K I F P L V S S R D F N L T A R S G . . . . . Y

910 920 930 940 950 960 970

H.sapiens N Q I L Y R C E S E E . . . . . K E D G G G C Y D I P N W S A L K Y A G L Q G L M S V L A E I R P K N D L G H P F C N N L R S G D W M I D Y V S  
S.cerevisiae N S V L Y R S E P E E Y D V S A G E G G A Y I I P N F G K P V Y C G L Q G W V S V L R K I V F Y N D L A H P L S A N L R N G H W A L D Y T I  
S.elongatus M D V Q P V D R G L K V T A F P E A T P P Y L F A T W . . . . . G K W A I A P E W Y R D F E L A V E A E R G L D D R D D N L R V G S L T V T L N P  
D.radiidurans V Q G E R A T R V T L Q L R P E L A T G A V P A Q P L . . . . . I Q A L T P Q P F A Q R V Y R A D A T R G E T P H D V T L G C P L W S V T L P P  
T.acidophilum K N F A S T K K K N A L R I S D G R . Y C I D I V S P . . . . . G D F Y E K R Y W Y N F R Y R R E V E R G T N S E E D Y L N P G V L D R P G  
V.vulnificus P T T L A I V P E L N I A L N D C Q I K T Y G Q C V L V E I N P E R V P E G A P R F L A L S A N Q A V E A Q E V T F E Q C P A L D Y A V H L  
M.acetivorans L S F Y Q K A G P A G V E L A S S N G F T P S L S S N . . . . . L Q Y H P D P I W Y F N L E Y D T E K K R G L N F Q E D I F N P G Y F E S K L E P

980 990 1000 1010 1020 1030

H.sapiens N R L . . . . . I S R S G T I A E V G K W L Q A M F F Y L K Q I P R Y L I P C Y F D A I L I G A Y T T L L D T A W K Q M S S F V Q N G S T F V K H  
S.cerevisiae S R L N Y Y S D E A G I N E V Q N W L R S R F D R V K L P S Y L V P S Y F A L I I G I L Y G C C R L K A I Q L M S R N I G K S T L F V Q S  
S.elongatus G E T L C L I A S T E A S P D L D A A A S L Q R Y Q D R T Q A K L Q . . . . . Q W Q A A N P T L A D Q A P D W V R Q  
D.radiidurans G G G E V A L V V Q G V T P T A P V P D P W T A F E A E R V R R R . . . . . G L A E R A W Q T T G V R D E L V A T  
T.acidophilum N S L E V V I T A E N N I T . . . . . F D E A L K K Y R . . . . . T F R S V D G L L A D  
V.vulnificus D G G N C K L R L T T S Q P S T L L T L Y L C F E H D K E T A I Q Q . . . . . A Q N A A Y Q H A D L Q H Q H Q L Y  
M.acetivorans G A S R F F V A A S T K D I S S L T L E Q V D K L Y V R E A N R . . . . . Q N L L I L D S K L I E S F A L K

1040 1050 1060 1070 1080 1090 1100

H.sapiens LSLGSLVQLCGVGKFPSPILSPALMDVYPYRLNEITKEKEQCCVS LAAGLPHFSSGIFRCWGRDTEFTALRG

S.cerevisiae LSMTSLQMVSR.MKSTSI LP.GENVPSMAAGLPHFSSVNYMRCWGRDTEFTALRG

S.elongatus LVLAADQFIVDRPLPN.HPQGSILAGYHWFAD.WGRDTEFTALRG

D.radiiurans LAVAADAFLVRRGQETKRGSGKGG.ASKGTPRGLSVIAGYHWFAD.WGRDTEFTALRG

T.acidophilum LRYNSLSFLMR.HDMIAGFHWFGP.WGRDTEFTALRG

V.vulnificus HFLTNDNFYCDQYENRAVMWARLASR.TFVSHFEFVGIWAGLPHFKD.CWGRDTEFTALRG

M.acetivorans LLRAIDSFVVKNHATG.ENTVIAGYHWFSD.WGRDTEFTALRG

1110 1120 1130 1140 1150 1160

H.sapiens LLITGRGYVEARNITILAFAGT.LRHGLIPNLLGEGIYA.RYNCRDVAVWWWLQC IQDYCKMV

S.cerevisiae MLLTGRGFDEAKAHILAFAKT.LKHGLIPNLLDAGRNP.RYNARDAAWFFLQAVQDYVYIV

S.elongatus LTLATGWPDALARLITLFAQF.VSQGLMPLRFPDDGNPLTDADYNTVDATLWYVEAVRQYLDCS

D.radiiurans LTLVTGRFEDARLITLFLGQ.RRGLIPNHFDSEGO.GAGYNTVARPLNLAVALERIARTT

T.acidophilum VLLVSGRYNEARRVLEHYAER.IQDGMIPN.TQDVE.ALRFPSADTSLWFIYAVQKYLEYA

V.vulnificus TSLINGLFDKAKIISNFASMQKSNLDDVNHGRIPNRVTSKTN.IIYNTDGTPTWIREIMEVLYHS

M.acetivorans LLLIIPYRFEEARSALNNFARY.CRGLIPNTFFPAFGD.PIYNTVDASLWFIHALDRYFAYT

1170 1180 1190 1200 1210 1220 1230

H.sapiens PNGLDILKCPVSRMYPTDDSD.APLPAGTLDQPLFEV IQEAMQKHMQGIQFRERNAGPQIDRNMKDEG

S.cerevisiae PDGEKILQEQVTRRFLDDTYIPVDDPRAFSYSSSTLEEI IYELSRHAKGKIFREANAGPNLDRVMTDKG

S.elongatus GDKT.LLAEIFPVLQNIIGWHQRGTRFNH.LLAEIFPVLQNIIGWHQRGTRFNH

D.radiiurans GDDL.FVROALPMLRELLGSLVQGTDYGIG.FVROALPMLRELLGSLVQGTDYGIG

T.acidophilum GDD.FARQMLVPIKSIITAYIKG.NSMFH.FARQMLVPIKSIITAYIKG.NSMFH

V.vulnificus GDMA.FAQQIYPPVQRFIQGVEKH.FAQQIYPPVQRFIQGVEKH

M.acetivorans QDFL.FLSDVWDTVSIIDNYCAGTDFAIQ.FLSDVWDTVSIIDNYCAGTDFAIQ

1240 1250 1260 1270 1280 1290 1300

H.sapiens FNITAGVDEETGFVYGGNRFNCG.TWMDKMGESDRARNRGI PATPRDGS AVIEVGLSKSAVRLWLELSKKN

S.cerevisiae FNVEIHVDWSTGLIHGGSQYNCG.TWMDKMGESKAGSVGIPGTPRDGAAIEINGLLKSAIRFVIELKKNK

S.elongatus LDPQDGLLTAGAAGVQLTWMDKAVG.DWVVTPRIGKPVETINLWYAAALRSLAHPARCL

D.radiiurans MPADALLRAGEPGVQLTWMDVKIH.DWVVTPRHGKPVETIQALWLAAALGAE LRLSQAL

T.acidophilum LDDDLVLTGS.PL TWMDAMVS.GKPVTPRIGKPIETINLWYNAALSFYSRTAHD I

V.vulnificus YLDEDGLMSHRD.PD TWMDAKING.QIPWSPRGPKANDEIQALWFE SLQIAEQALWQ

M.acetivorans MDSDYLIWQGP.QL TWMDKAVG.EWAVTPRAGKACEVNALLWYNALKTAS YMG.TL

1310 1320 1330 1340 1350 1360

H.sapiens IFPYHEVTVKRHGK.AIKVSYDEWNRKI QDNFEKLFHVSEDPS.DLNEKHPNLVHKRGIYK

S.cerevisiae LFKFSDVETQDGG.RIDFTEWNLQDNFEKRYVYPEDPSQDADYDVS AKLGVNRRGIYR

S.elongatus GQP.STDYDQAAETLQGFQRFWQADRGYCFDVLDSPTGSDASLR.P

D.radiiurans GEPPRYAAVLERAHHSFKAQFWNH.AADLTAAPTATLLGLQLGSSLLGALSADALDGD FVLDDEPRDTS

T.acidophilum TGED.EMFSLKARRIKKFRAKFKG.DAVLDVSDPDDMK.FRP

V.vulnificus GDEA.FAQHCHQLATKAQESFVTKFWQPEERCLADCLRHGDEADLSQR.P

M.acetivorans LGED.ISSYETLAAGVANSFNENTFWNPNESNCLFPLIHQDEAGNQVKDPAIRP

1370 1380 1390

H.sapiens DSYGASS.PWCDYQLRPNFTIAMVVAP.ELFT

S.cerevisiae DLYKSGK.PYEDYQLRPNFTIAMTVAP.ELFV

S.elongatus NQLLAI.LGCDRQPALLPDQQ.ELFV

D.radiiurans DALLTVGGRRPGSGPVQSTTGASELGVGHRPGAAPAQPAV LADVIQPSGEQDLSVRPNVIALALADTPVV

T.acidophilum NFLIPIY.LPYPLLN.ELFV

V.vulnificus NQLMALT.IPMKRNL LAEIG.ELFV

M.acetivorans NQIFAVS.LPYTMLSPEK.ELFV

1400 1410 1420 1430 1440 1450 1460

H.sapiens TEKAWKALEIAEKKILGPLGMKTLDPDDMVYCGIYDNALDNDNYNLAKGFNYHOGPEVWLPIC YFLRAKLL

S.cerevisiae PEHAIKAITIADEVLRGPVGMRTLDPSDYNRYPYNNGEDSDDFATS KGRNYHOGPEVWVWLYGYFLRAFH

S.elongatus QQVVTLCGQQLLTSFGLRSLDPRHPQYQGHYGGD.QTQRDAAYHOGTVWAWLLGSAFIAHY

D.radiiurans DEQLDAVLAQTERELLTPVGLHLTSPHDPYVLYGNHYGG.QLLRDAAYHOGTVWVWPLASVYVLLLL

T.acidophilum DRKFVLDLAWEKLVTPYGLRLTSPDHPDYVPTYSGP.QPERDMAAYHNGTVWVWPLAGIFITAAV

V.vulnificus QHLVKNKCVDDLLFPWGLCSLAQSHQDFHPYHDNRS.EYHKDAAYHNGTIWGWNAAGFTVSALC

M.acetivorans EKALVDRVEKDLLTPFGKTLSSDHPLYKQYRGD.ALTRDTAYHNGTVWVWPLLGA YVKA YL

1470 1480 1490 1500 1510 1520

H.sapiens YFSRLMGP.ETTAKTIVLVKNVLSRHYHLLERSPWKGLPELNTN.ENAQYCPFS CETQAWSIAT

S.cerevisiae HFHFKTSPRCQNAAKEKPSYLYOQLYRLLKGRKWIIFESVWAGLTELNTN.KDGEVCDSSPTQAWSAC

S.elongatus AAFGDRAL.AAQVLQPIAH.HLQTAGLGTISEIFD.GDAPFLPRGCIAQAWSVGE

D.radiiurans KE.GELNR.ARAALALGT.HVWEAGIGHVSEVFS.GDA.LTPGCGCFQAWSVAE

T.acidophilum RTGYDKHA.LLEKFAGLFS.MSRTEIFD.GSGTGIKGCIMQAWSHGE

V.vulnificus QFGQDF.AYQLSKNLAKQILTQGHRTMSENLDAPQDENALVMTGTYAQAWSVSE

M.acetivorans KVNNSSKS.SLEMRVLEGFDAHLELVAGIGTISEVFD.GDYPHAPGGSIAQAWSVAE

1530

H.sapiens ILETLYDL.....  
S.cerevisiae LLDLFYDLWDAYEDDS.....  
S.elongatus LLRAWTVIHQTAVSPDPAAIALT.....  
D.radiidurans LLRAHVLVLSLSEAQAHEQARQTHTR.....  
T.acidophilum IARAYFEDLRGGRS.....  
V.vulnificus FARNQAQQDYLGFMPLAEKRMLLHPQLPARWHKVKARLPFGQHNALLFTVTRQDNTGQSNTLIYSVKPER  
M.acetivorans LLRAYVEDVLGIKP.....

H.sapiens .....  
S.cerevisiae .....  
S.elongatus .....  
D.radiidurans .....  
T.acidophilum .....  
V.vulnificus VEPTDIQLTLVLELEDKQLHLTFPLNEARSFIVSDGQLKPLAQEVTLTVVDKPHYALLENLSFAQPDWQRK  
M.acetivorans .....

H.sapiens .....  
S.cerevisiae .....  
S.elongatus .....  
D.radiidurans .....  
T.acidophilum .....  
V.vulnificus HHALQQQDYLRQKRMADNLALAED  
M.acetivorans .....
